# Supplementary material
Source: PubMed Central journal article supplement (PMC4631617)
Supplement: NIHMS728166-supplement-1.pdf [file NIHMS728166-supplement-1.pdf]

| Assay ID      | Gene Symbol | Gene Name                                      | Context Sequence            | Target Exons |
|---------------|-------------|------------------------------------------------|-----------------------------|--------------|
| Mm00504666_g1 | Atad3a      | ATPase family, AAA domain containing 3A        | CAGGAAACGAGCGACTGAAAAGATA   | 12           |
| Mm00457268_m1 | Creb3       | cAMP responsive element binding protein 3      | CTCTCACTAAGGTGGAGGAACAAGT   | 4            |
| Mm00438930_m1 | Fgfr1       | fibroblast growth factor receptor 1            | GGAGCTGCCACGAGACAGACTGGTC   | 9            |
| Mm01269930_m1 | Fgfr2       | fibroblast growth factor receptor 2            | AAAAGACCACAAATGGGCGACTTCC   | 13           |
| Mm01188138_g1 | Id3         | inhibitor of DNA binding 3                     | CCCGATCCAGACAGCTGAGCTCACT   | 1            |
| Mm01946604_s1 | Neurod1     | neurogenic differentiation 1                   | AAAATGCAGTCCAGAATAAGTGCTG   | 24           |
| Mm00440465_g1 | Neurod2     | neurogenic differentiation 2                   | CCTCTCTGAGGCACCATGCTGACCC   | 1            |
| Mm00456222_m1 | Ntrk3       | neurotrophic tyrosine kinase, receptor, type 3 | CGGGAATTGAGACTGGAGCAGAACT   | 4            |
| Mm00476979_m1 | Pmp22       | peripheral myelin protein 22                   | TCCTTGCTGGTCTGTGCGTGATGAG   | 4            |
| Mm00804502_m1 | Prcp        | prolylcarboxypeptidase (angiotensinase C)      | TTCGAACAGAAGGTTGACCACTTTG   | 1            |
| Mm00465365_m1 | Prdx5       | peroxiredoxin 5                                | CGATCAAGGTGGGAGATGCCATTCC   | 1            |
| Mm00465200_m1 | Reln        | reelin                                         | AGAAAACATGGTCCGGTGCCACCCG   | 22           |
| Mm03928990_g1 | Rn18s       | 18S ribosomal RNA                              | TACTTGGATAACTGTGGTAATTCTA   | 1            |
| Mm00456921_m1 | Snap25      | synaptosomal-associated protein 25             | GATGAGCAAGGCGAACAACACTGGAAC | 4            |

## Supplemental Table S1
