# Supplementary material
Source: PubMed Central journal article supplement (PMC4631617)
Supplement: NIHMS728166-supplement-6.pdf [file NIHMS728166-supplement-6.pdf]

A

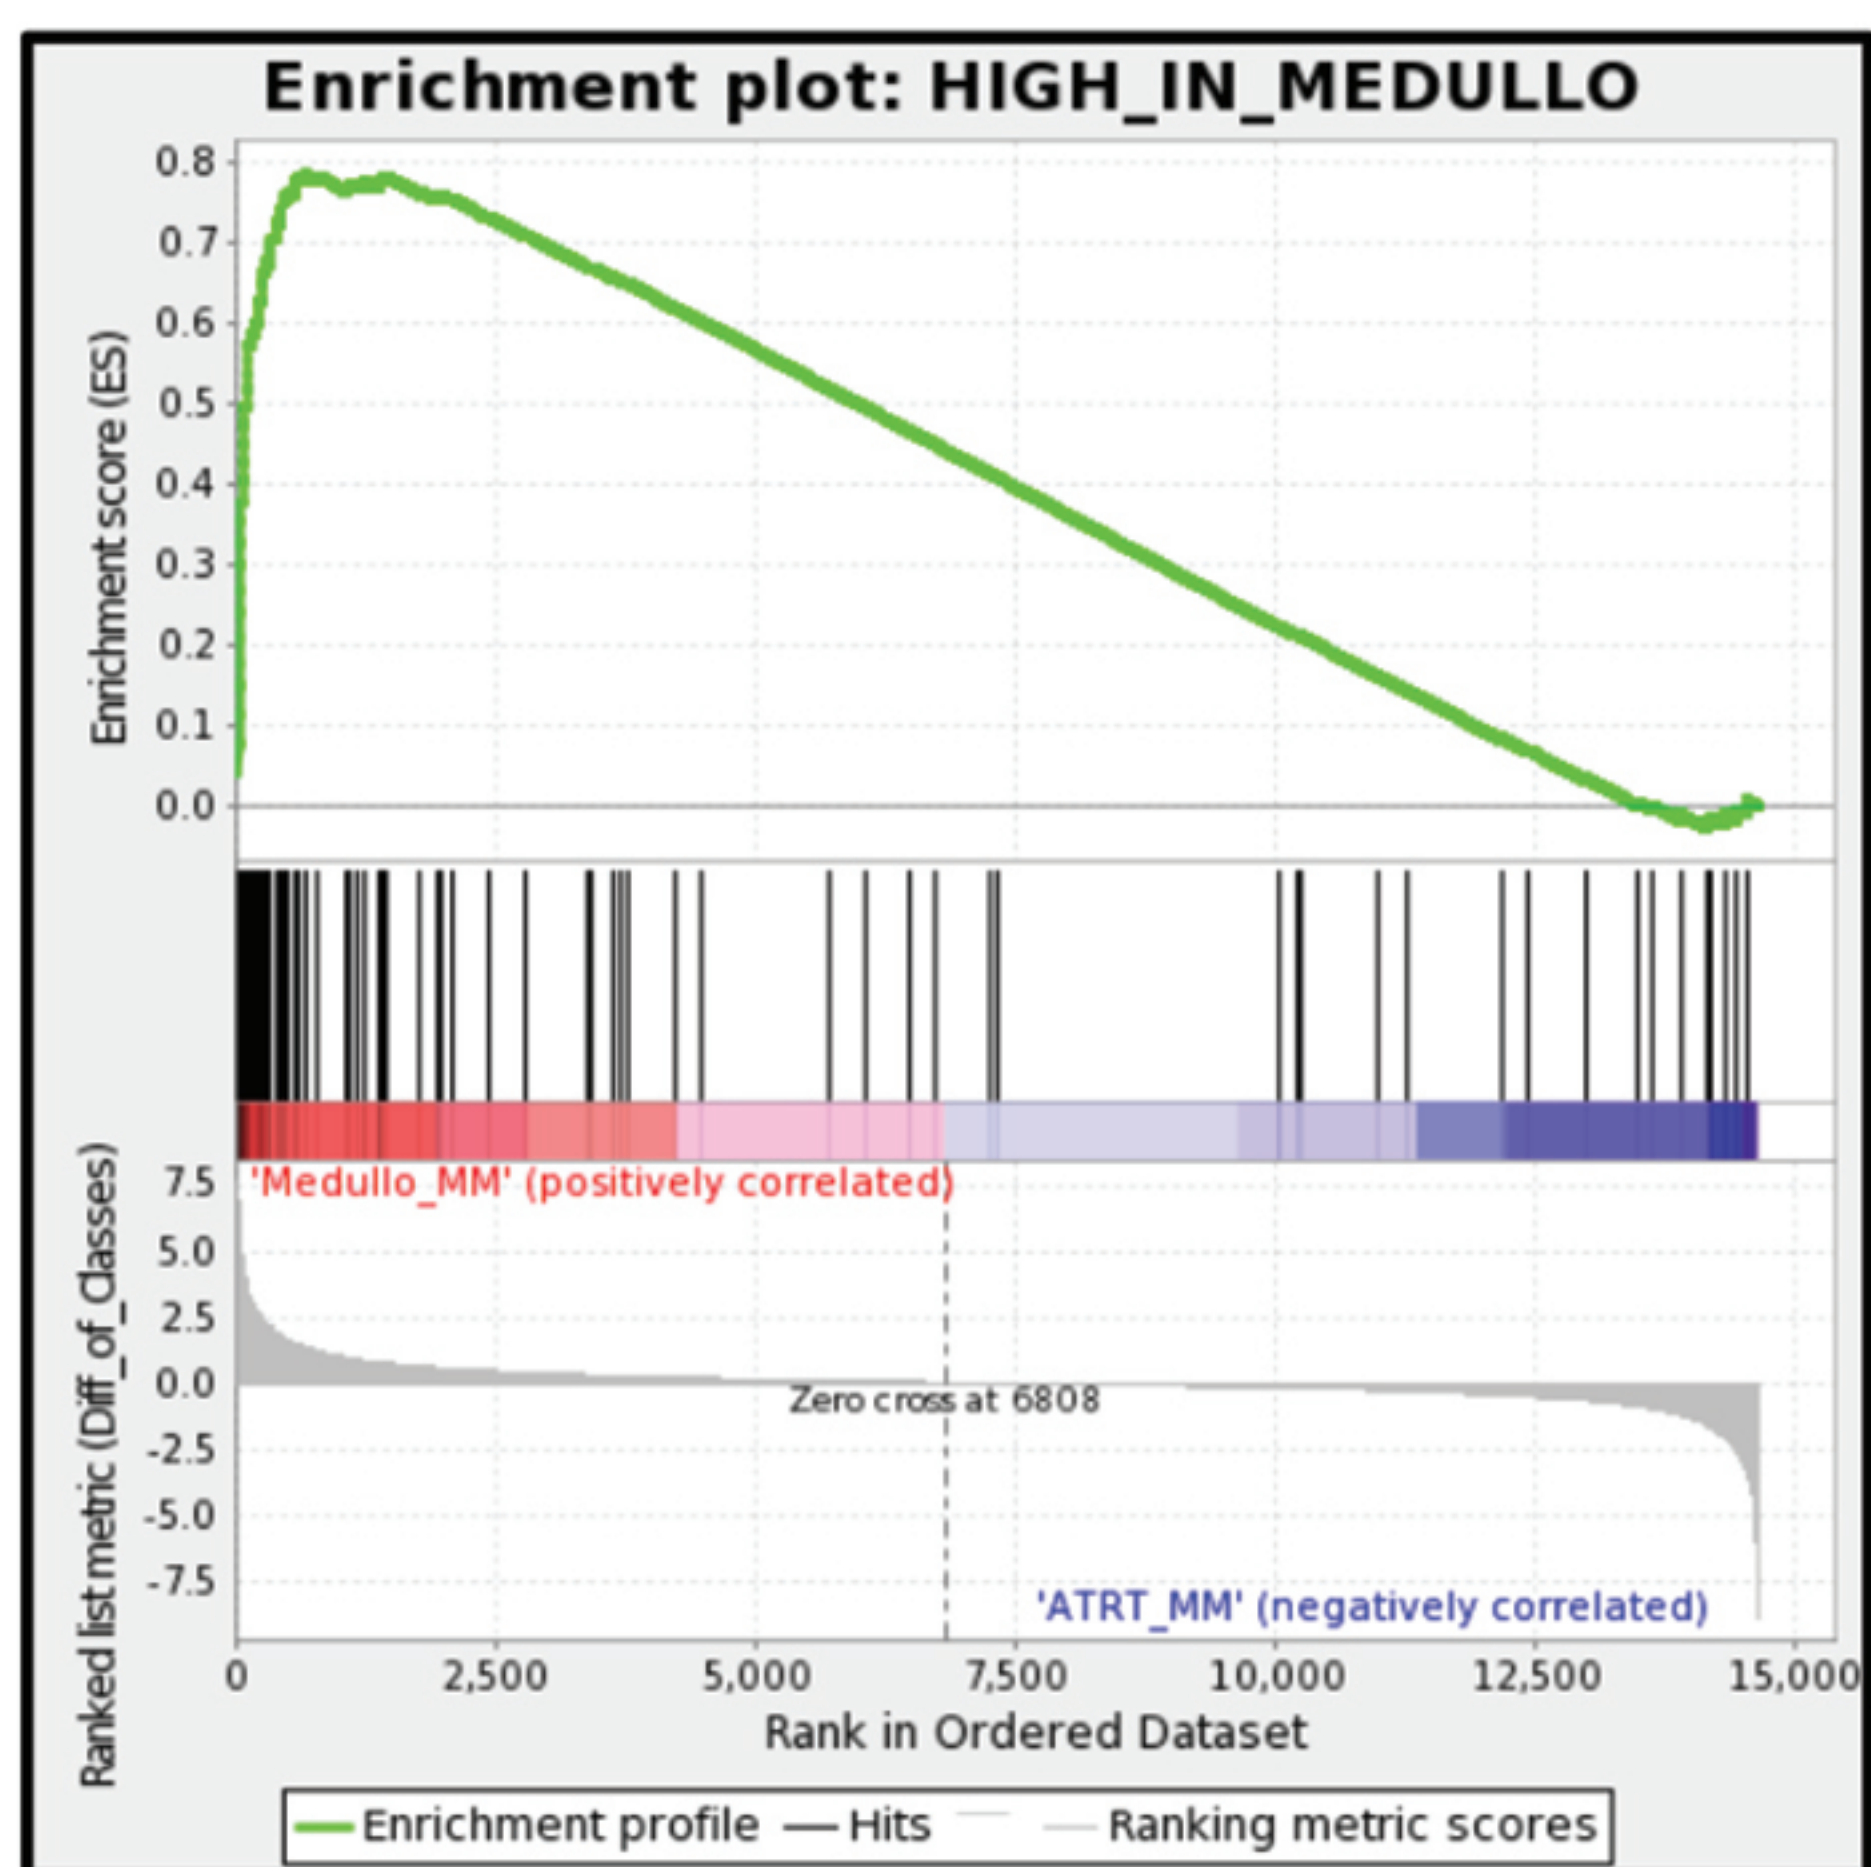

P = 0.0; FDR = 0.0

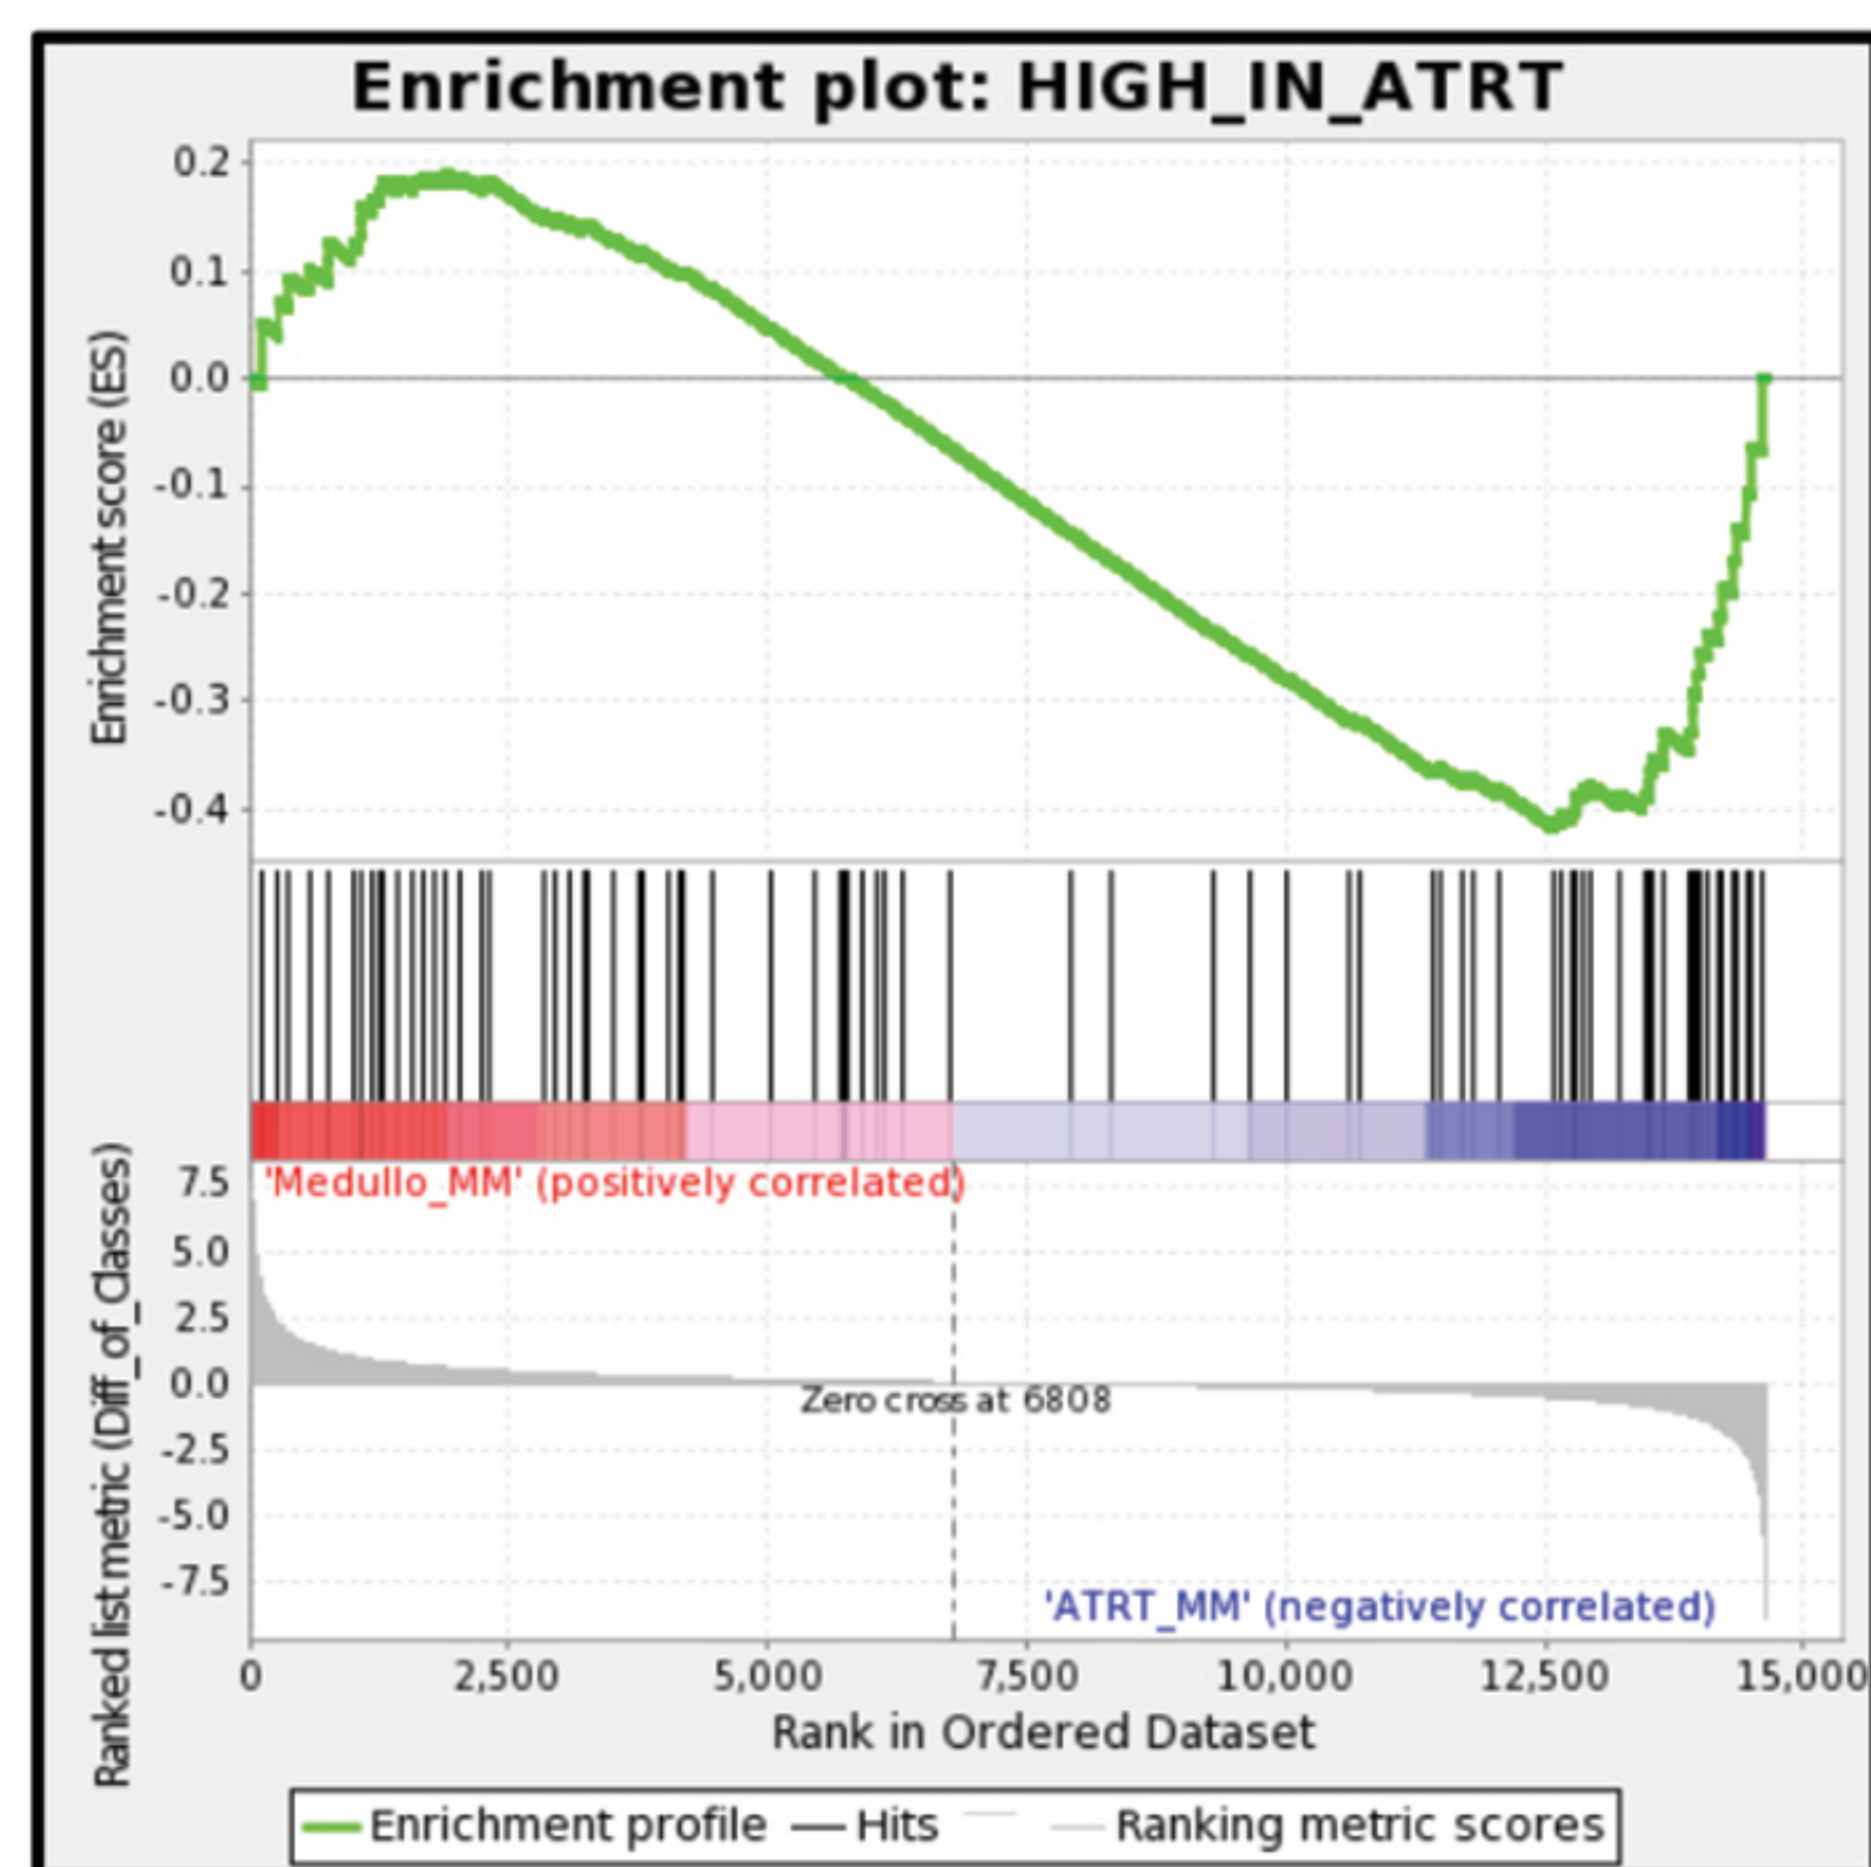

P = 0.055; FDR = 0.05

B

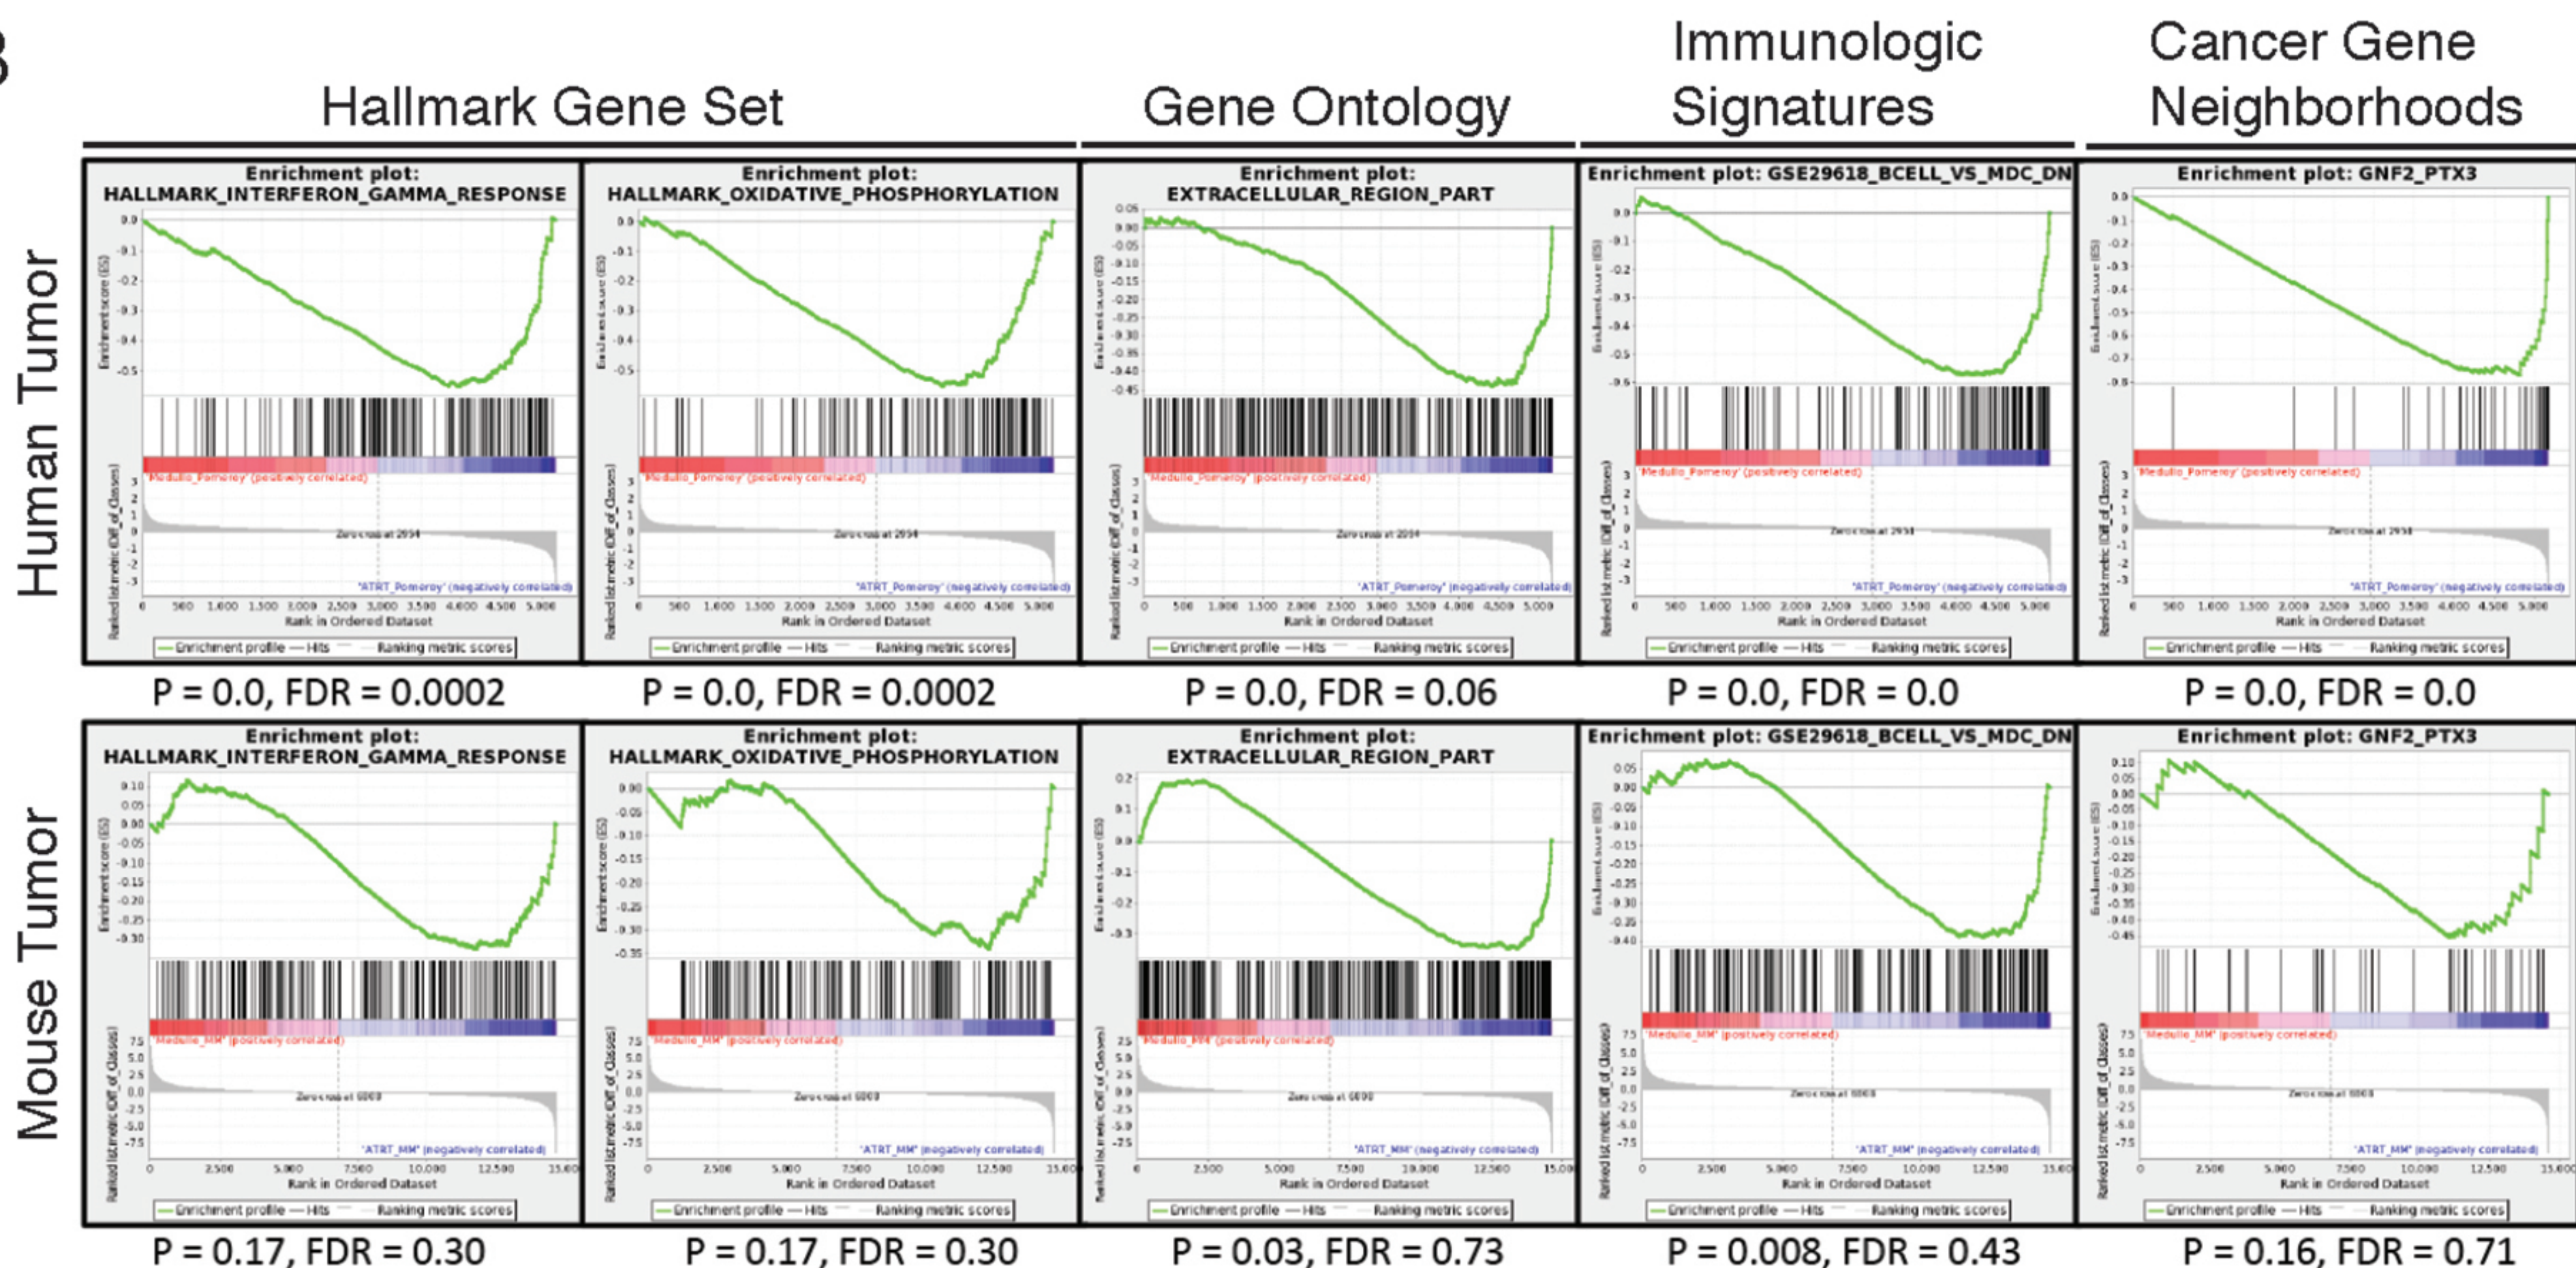

C

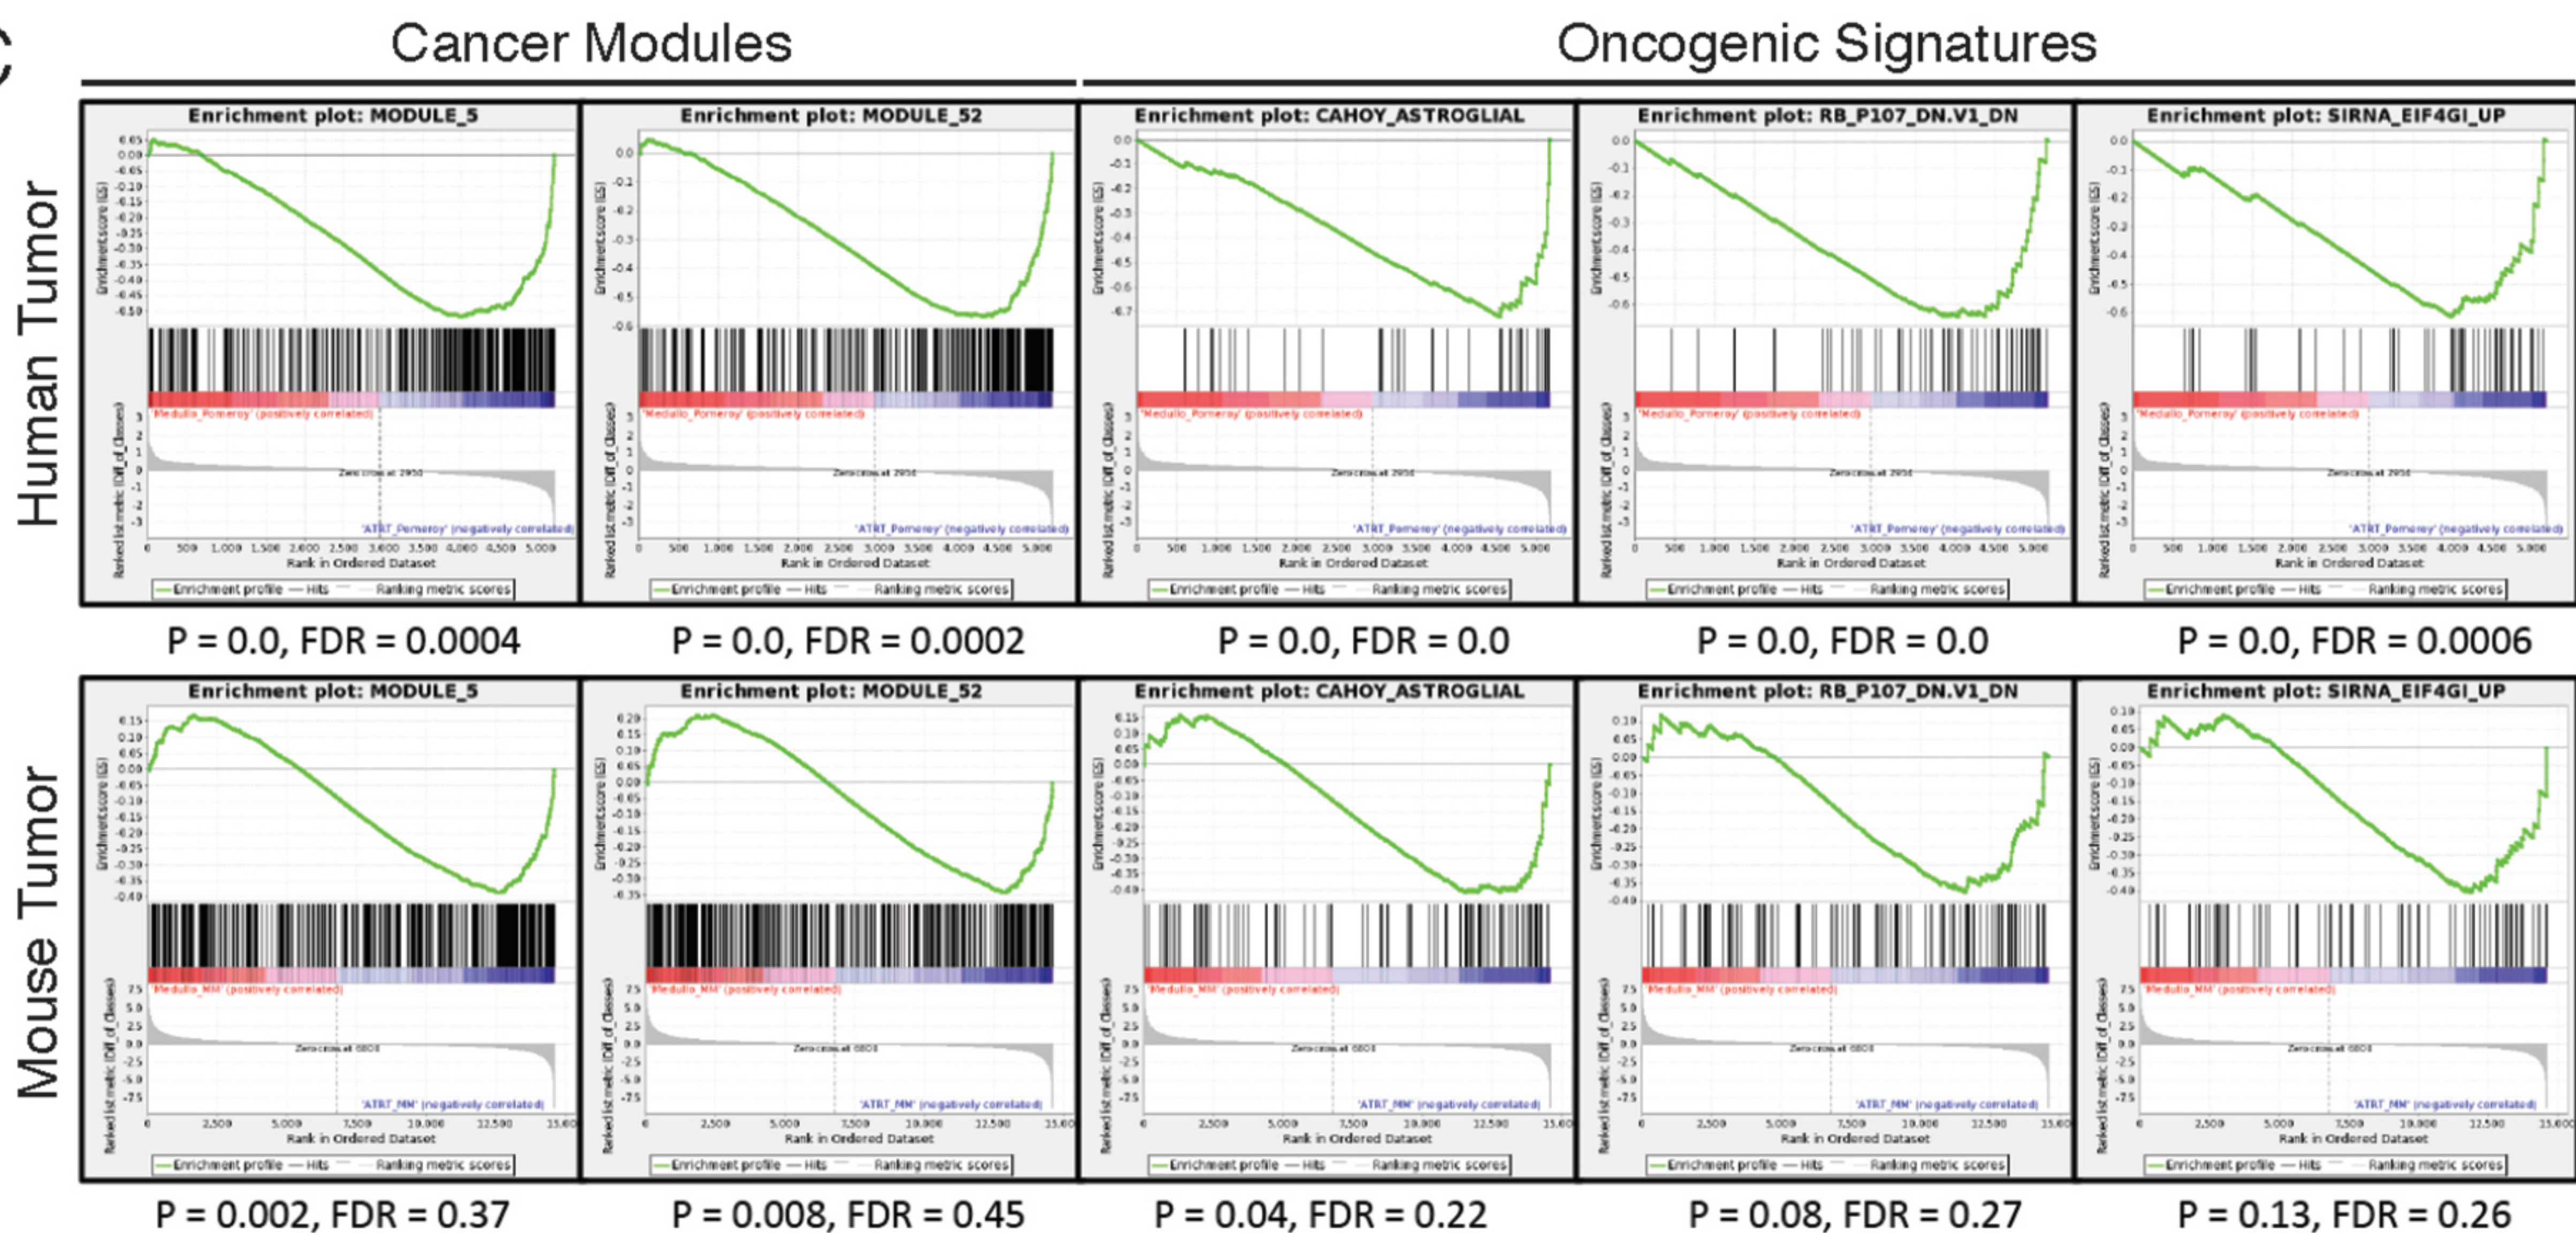

Supplemental Figure S5

D

Cancer Gene Neighborhood

Chemical and Genetic Perturbations

Human Tumor

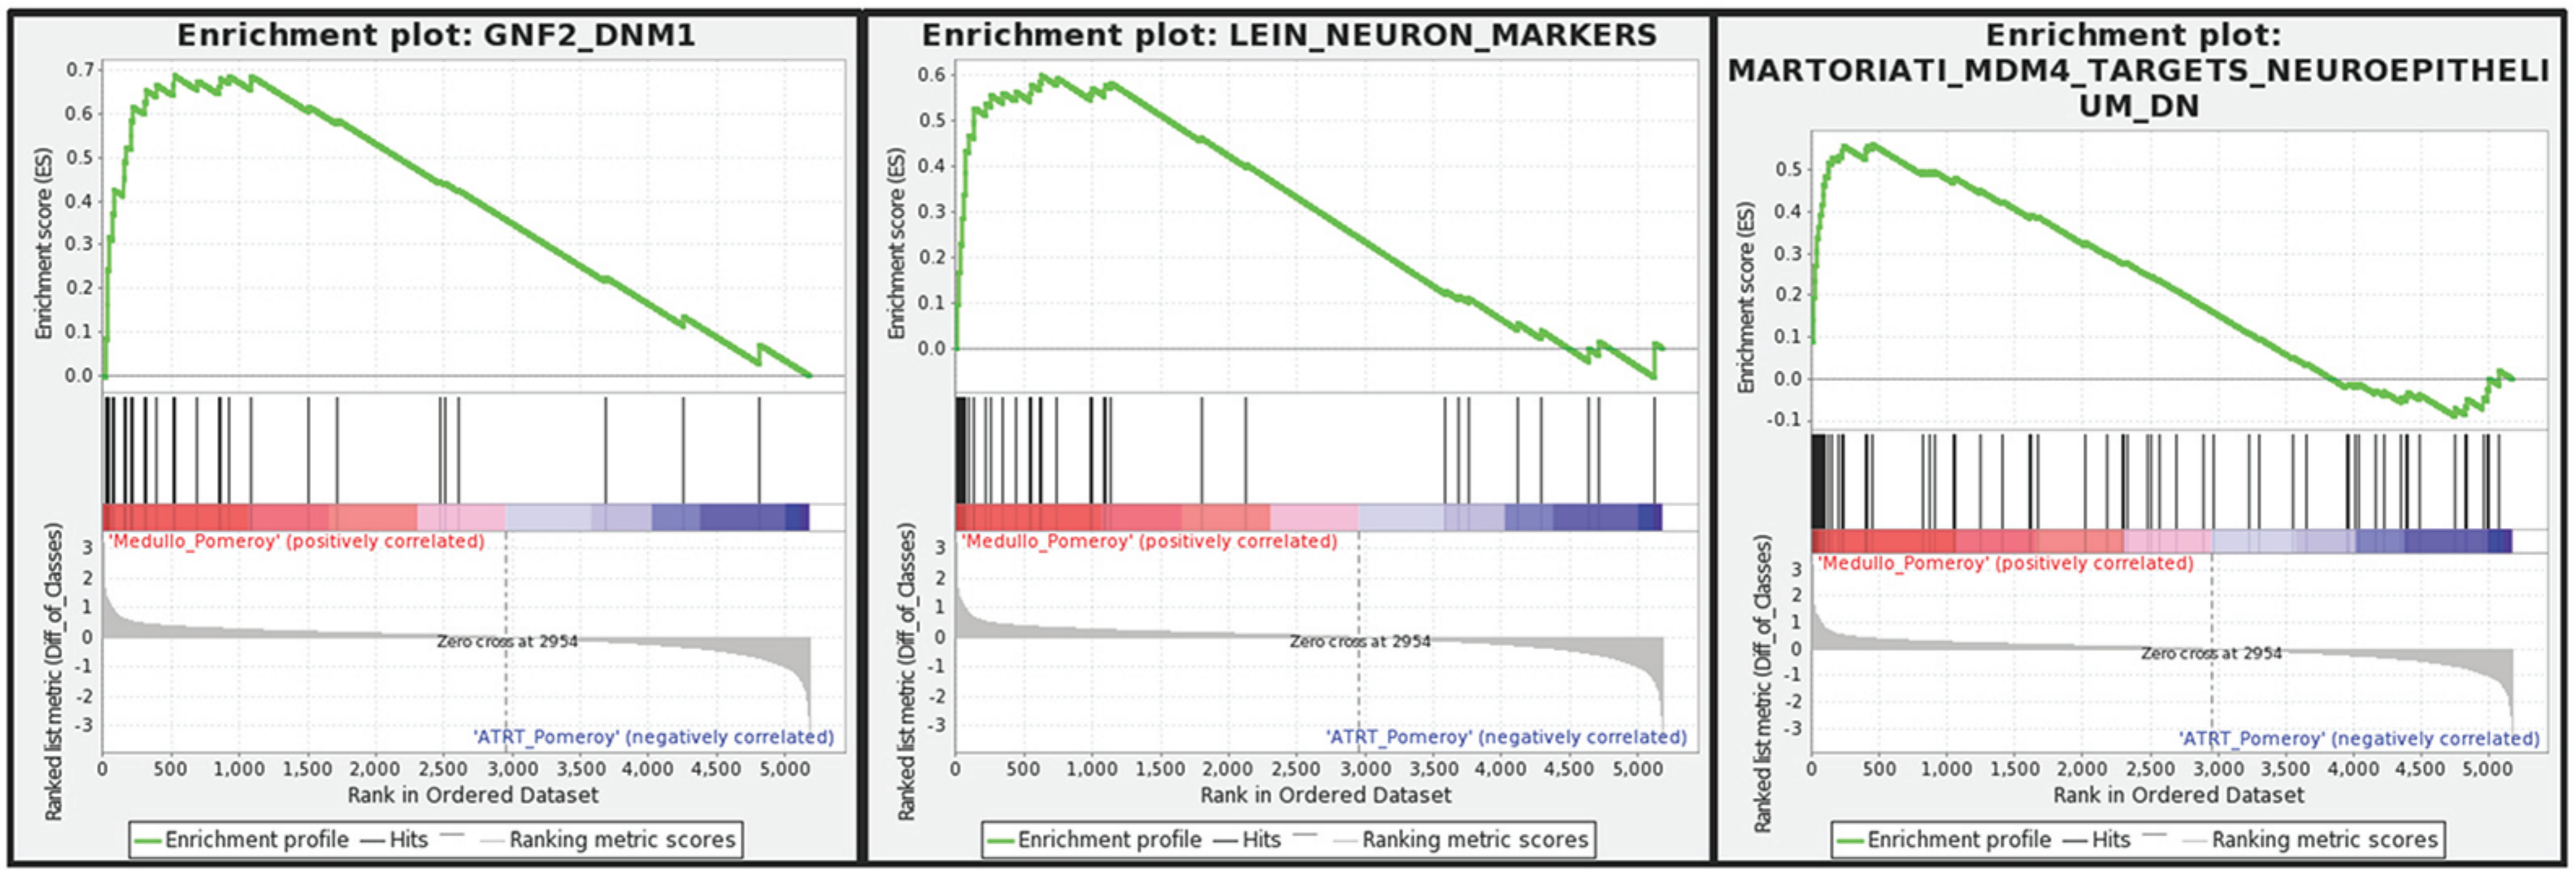

P = 0.0; FDR = 0.0

P = 0.0; FDR = 0.007

P = 0.0; FDR = 0.0008

Mouse Tumor

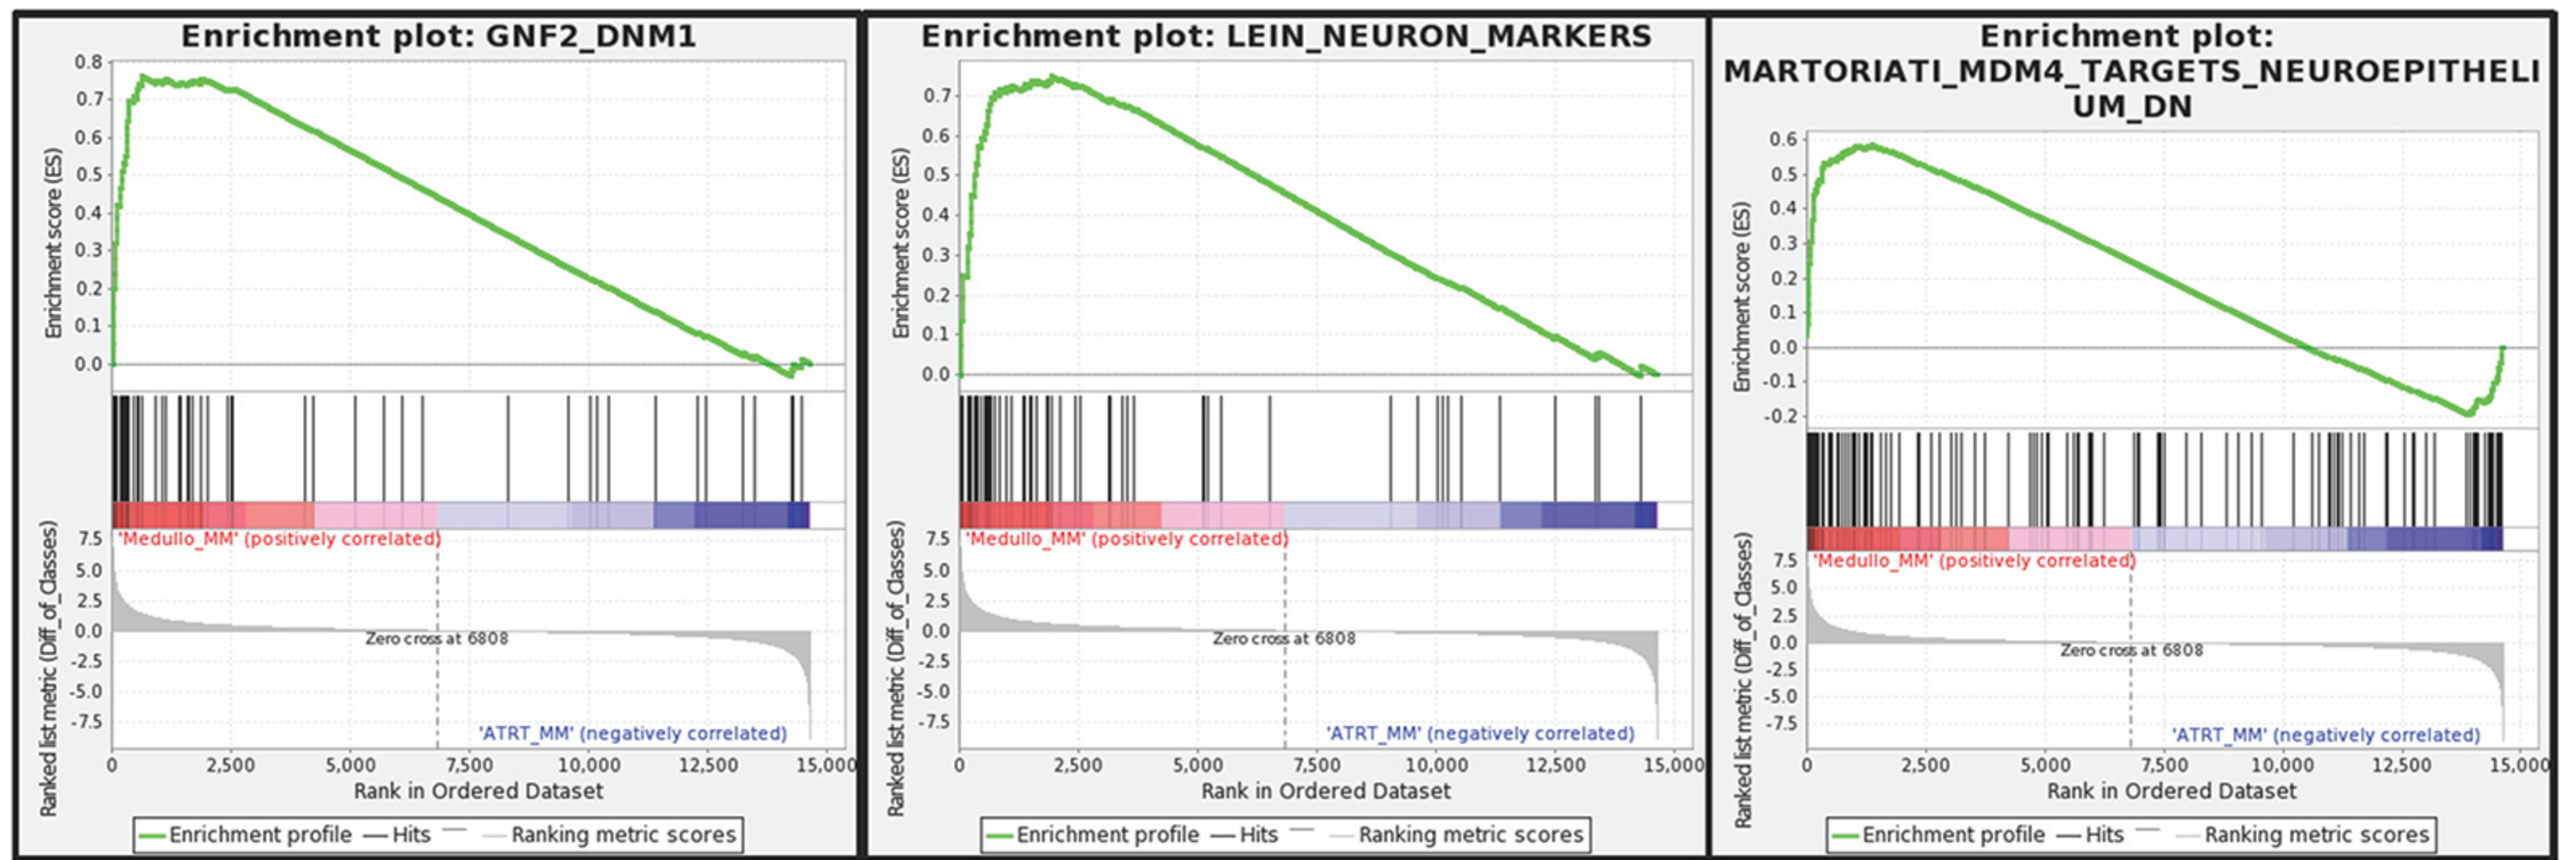

P = 0.0; FDR = 0.0

P = 0.0; FDR = 0.0

P = 0.0; FDR = 0.006

Supplemental Figure S5D
